# Supplementary material for: 3D hierarchical honeycomb structured MWCNTs coupled with CoMnAl–LDO: fabrication and application for ultrafast catalytic degradation of bisphenol A
Source: Royal Society of Chemistry journal article supplement (doi:10.1039/c4ra15339a), 2014-12-24
Supplement: c4ra15339a1.pdf [file c4ra15339a1.pdf]

Figure Caption

Fig. S1. (a) TEM images of o-MWCNTs and (b) SEM images of CNTs-LDO-0.62.

Fig. S2. EDS mapping of (a) and (b) CNTs-LDO-1.23, (c) LDO, (D) CNTs-LDH-1.23 and (e) LDH on glass.

Fig. S3. XRD patterns of (a) CNTs-LDH and (b) CNTs-LDO..

Fig. S4. Raman spectra of (a) CNTs-LDH and (b) CNTs-LDO.

Fig. S5. TOC removal on different catalytic. Reaction conditions:  $[BPA]_0 = 10 \text{ mg}\cdot\text{L}^{-1}$ , catalyst dosage =  $0.02 \text{ g}\cdot\text{L}^{-1}$ , PMS dosage =  $0.15 \text{ g}\cdot\text{L}^{-1}$  and  $T = 30 \text{ }^\circ\text{C}$ .

Table Title

Table S1 The adsorption of Co and Mn during the preparation of samples

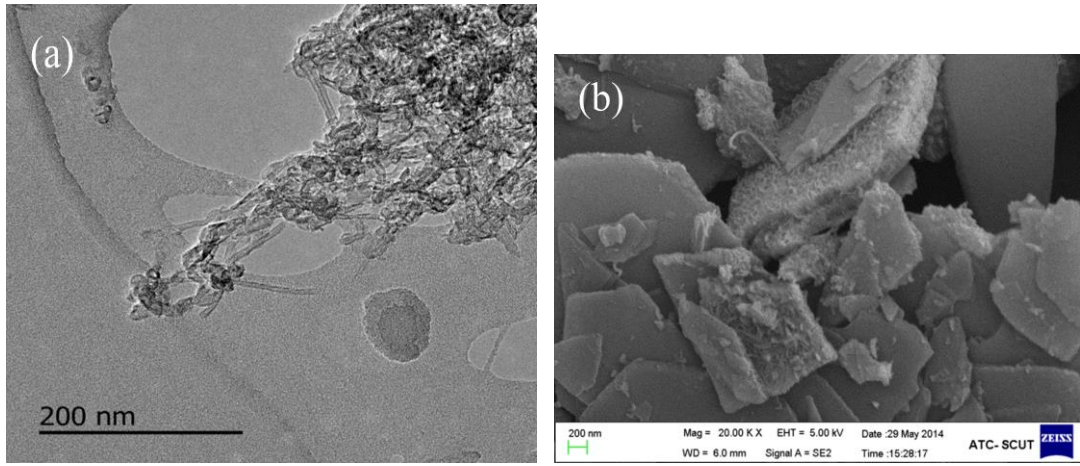

Fig. S1 (a)TEM images of o-MWCNTs and (b) SEM images of CNTs-LDO-0.62.

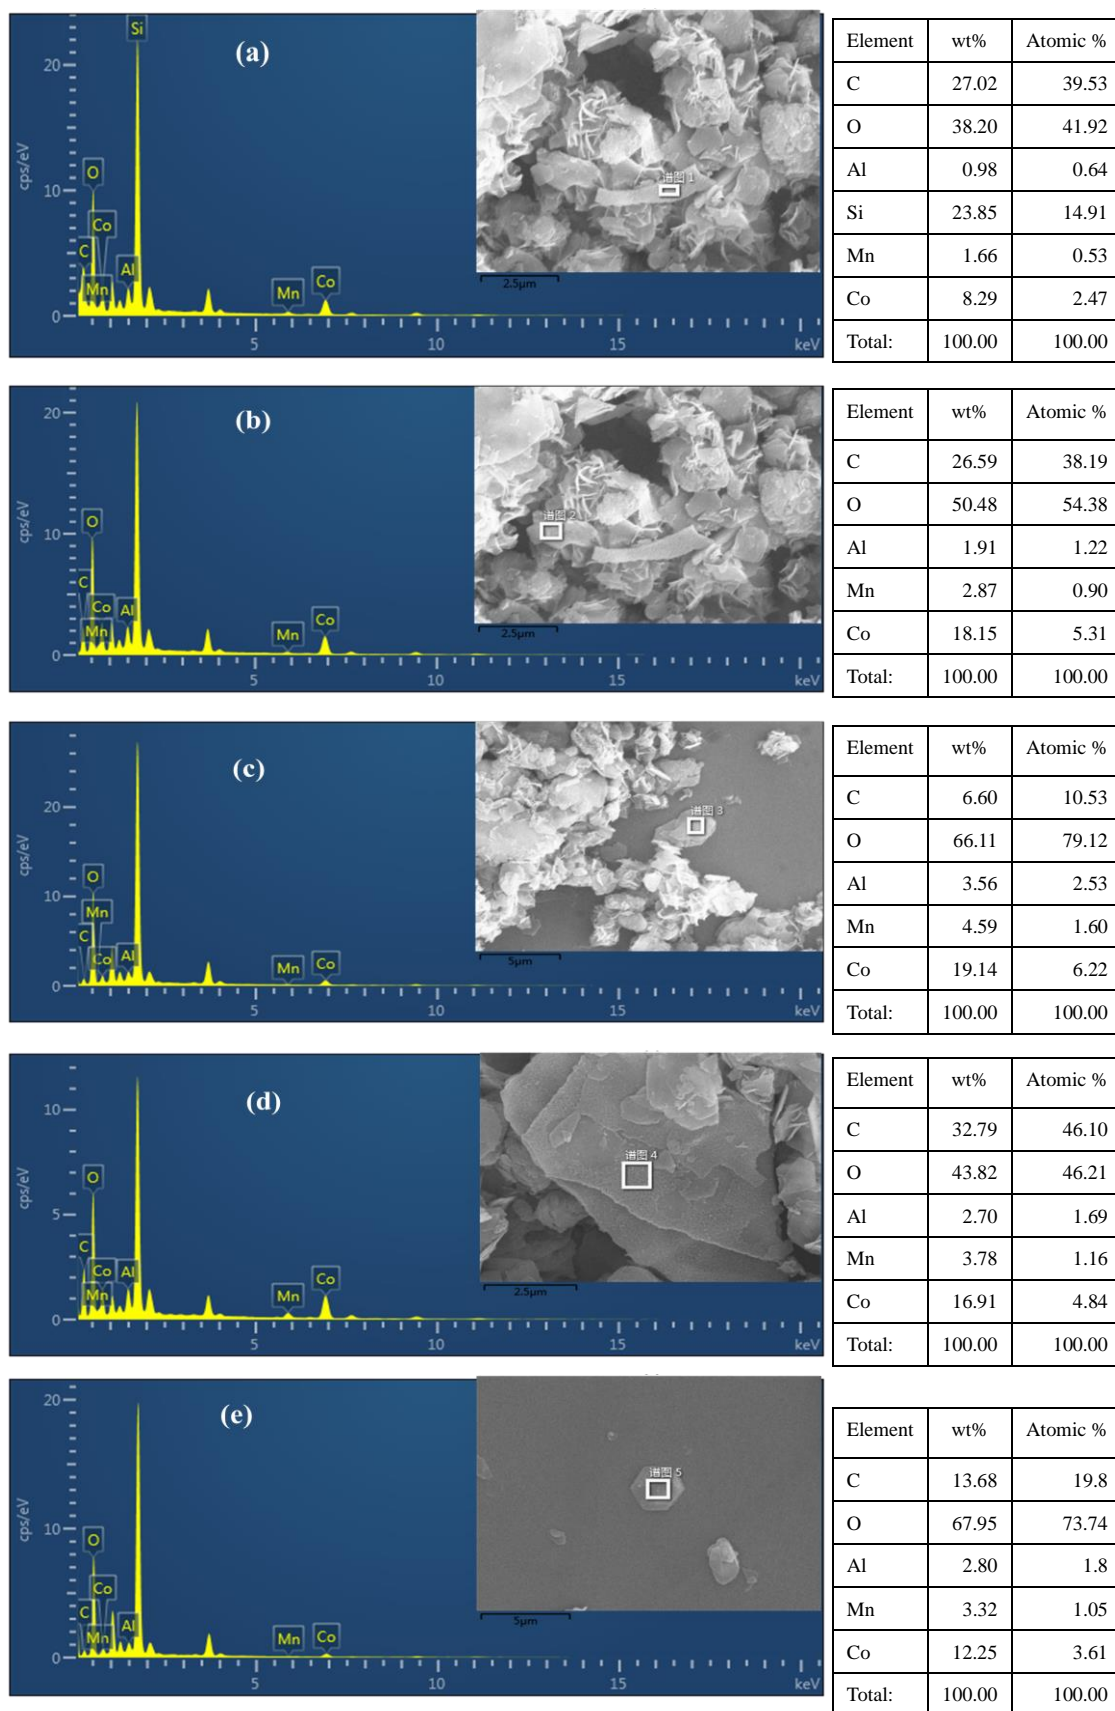

Fig. S2 EDS mapping of (a) and (b) CNTs-LDO-1.23, (c) LDO, (d) CNTs-LDH-1.23 and (e) LDH on glass.

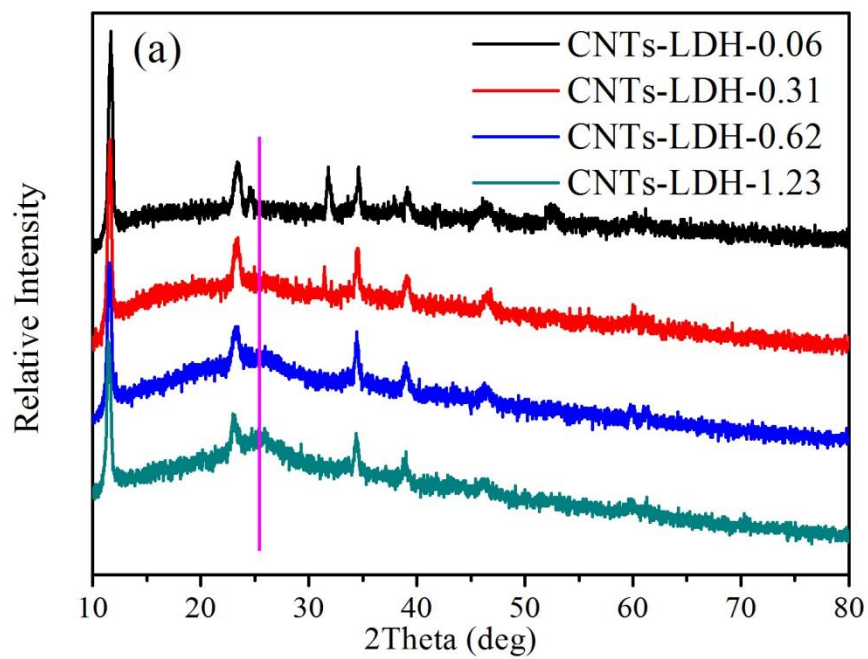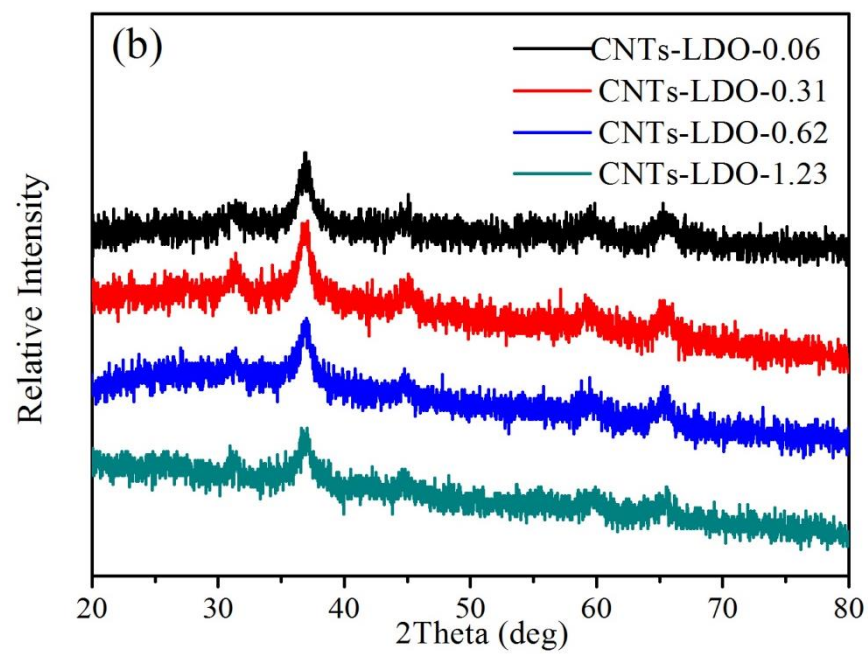

Fig. S3 XRD patterns of (a) CNTs-LDH and (b) CNTs-LDO.

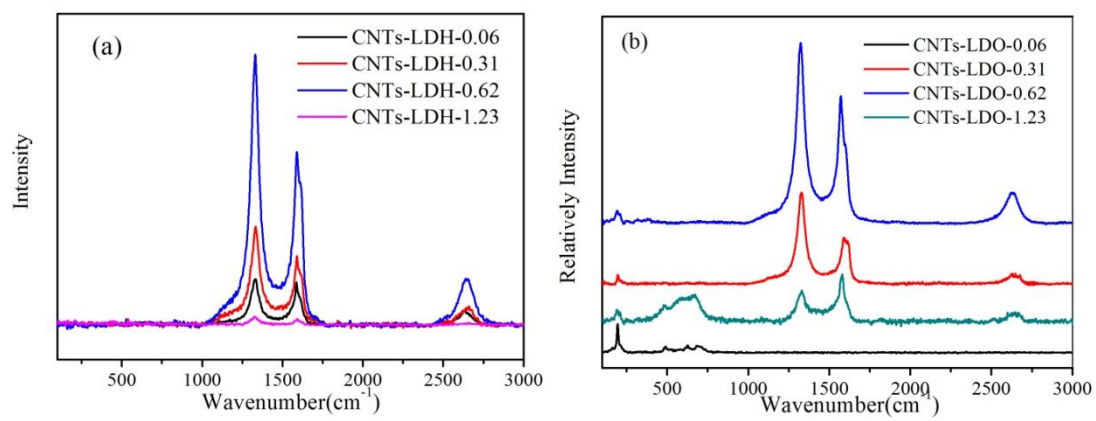

Fig.S4 Raman spectra of (a) CNTs-LDH and (b) CNTs-LDO.

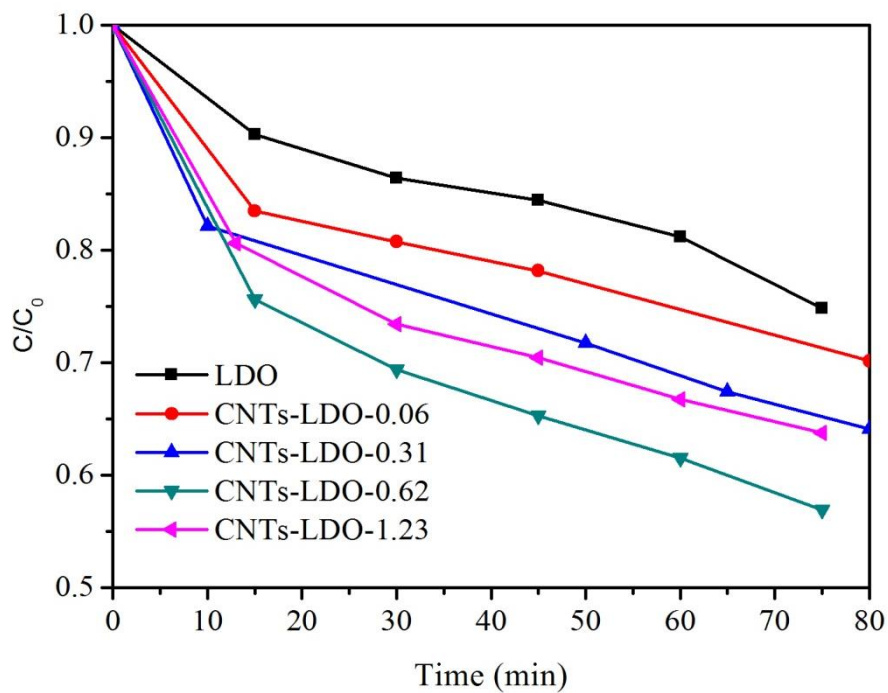

Fig. S5 TOC removal on different catalytic. Reaction conditions:  $[BPA]_0 = 10 \text{ mg}\cdot\text{L}^{-1}$ , catalyst dosage =  $0.02 \text{ g}\cdot\text{L}^{-1}$ , PMS dosage =  $0.15 \text{ g}\cdot\text{L}^{-1}$  and  $T = 30 \text{ }^\circ\text{C}$ .

Table S1 The adsorption of Co and Mn during the preparation of samples

| Samples       | $C_{Co}(mg \cdot L^{-1})$ |                  | $C_{Mn}(mg \cdot L^{-1})$ |                  |
|---------------|---------------------------|------------------|---------------------------|------------------|
|               | Initial concentration     | After adsorption | Initial concentration     | After adsorption |
| CNTs-LDH-0.06 | $424.5 \pm 6.2$           | $404.0 \pm 5.5$  | $102.5 \pm 0.7$           | $97.6 \pm 4.5$   |
| CNTs-LDH-0.31 | $87.0 \pm 2.8$            | $78.8 \pm 3.5$   | $20.75 \pm 1.5$           | $18.5 \pm 0.6$   |
| CNTs-LDH-0.62 | $45.5 \pm 1.5$            | $39.7 \pm 0.7$   | $10.6 \pm 0.1$            | $8.9 \pm 0.6$    |
| CNTs-LDH-1.23 | $23.2 \pm 0.4$            | $20.1 \pm 0.5$   | $5.17 \pm 0.2$            | $4.05 \pm 0.04$  |
